# Supplementary material
Source: PubMed Central journal article supplement (PMC5378104)

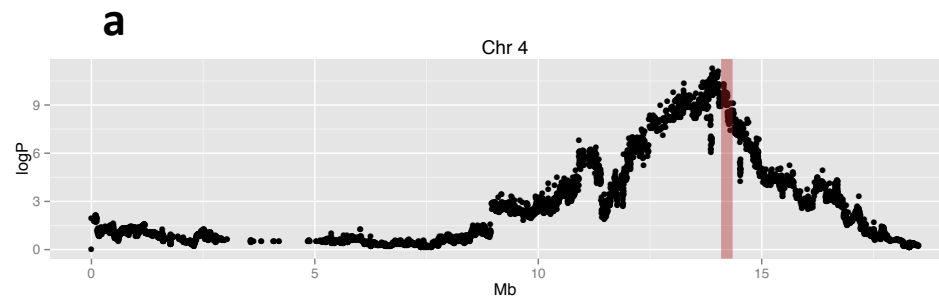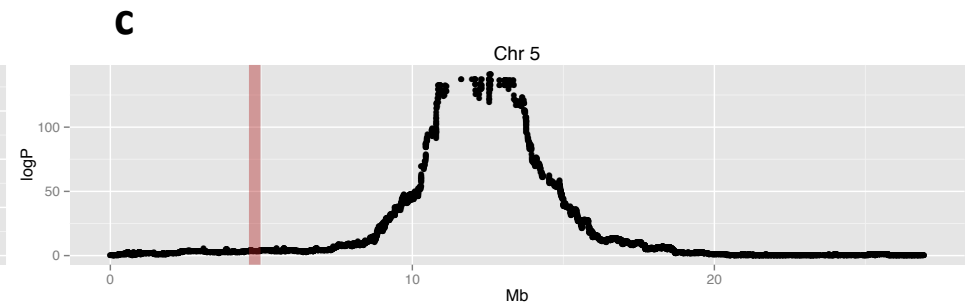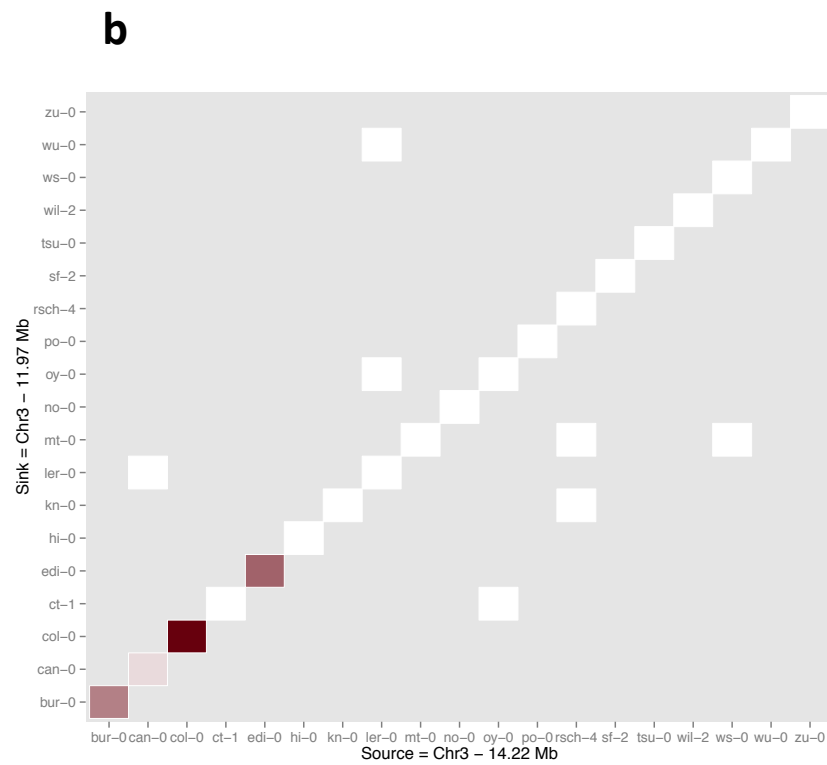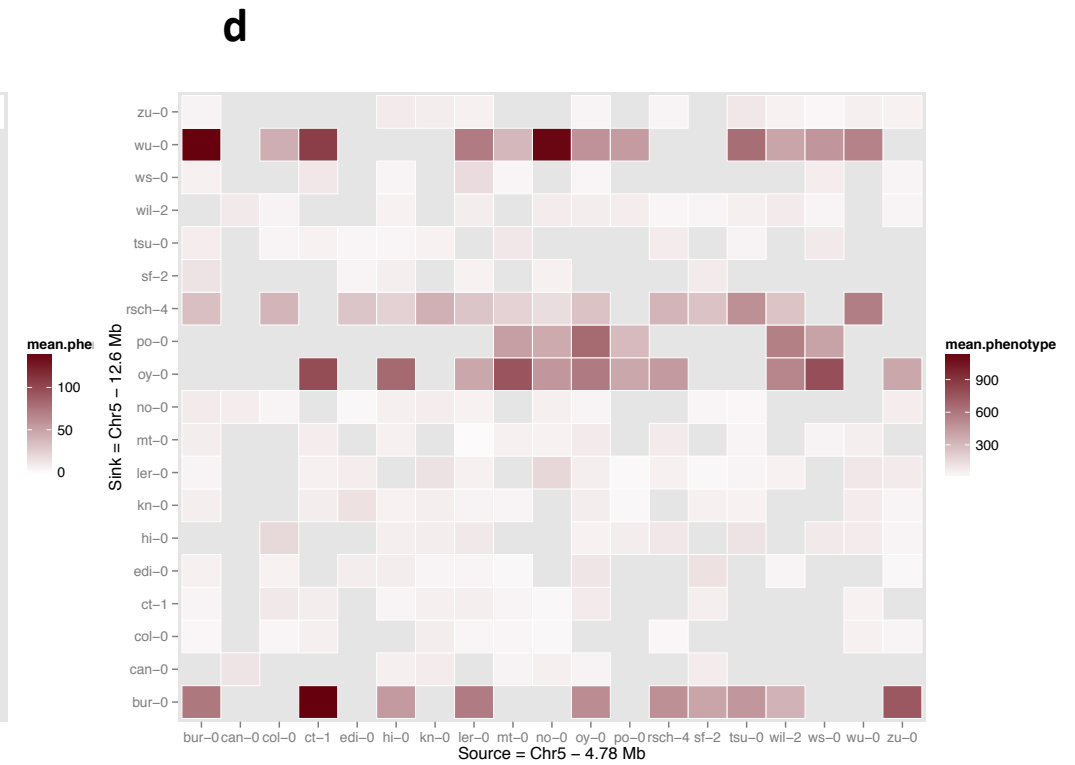

Supplement: 1425FigureS1.pdf [file 1425FigureS1.pdf]

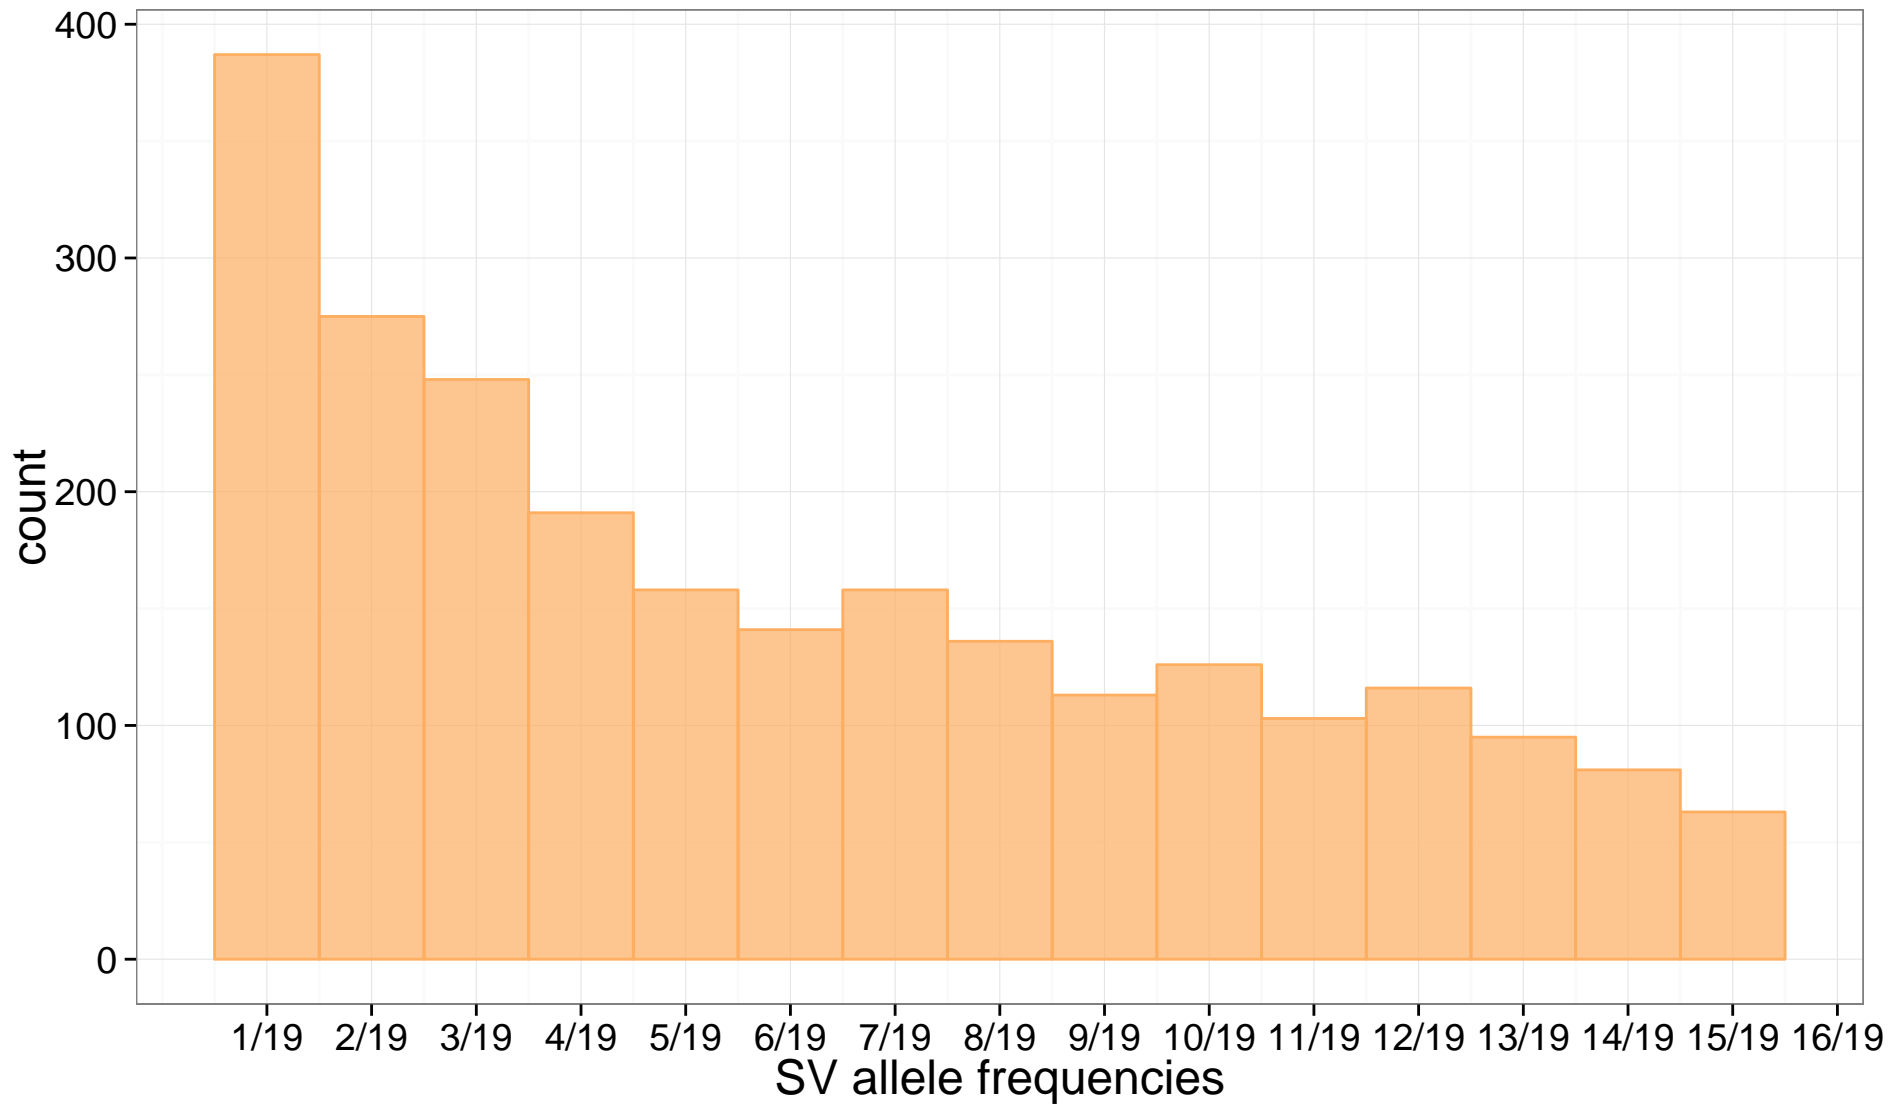

Supplement: 1425FigureS2.pdf [file 1425FigureS2.pdf]

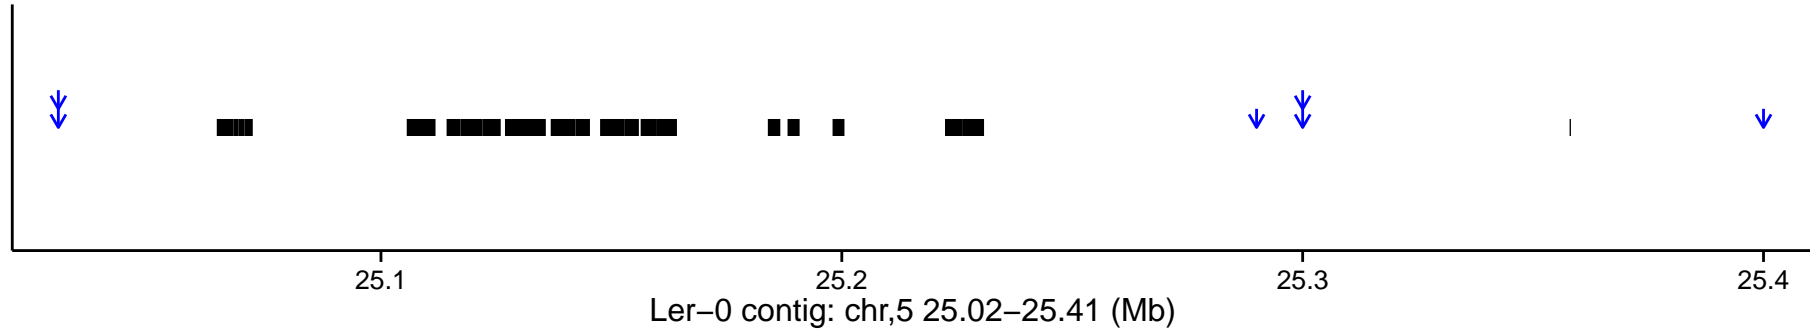

Supplement: 1425FigureS3.pdf [file 1425FigureS3.pdf]

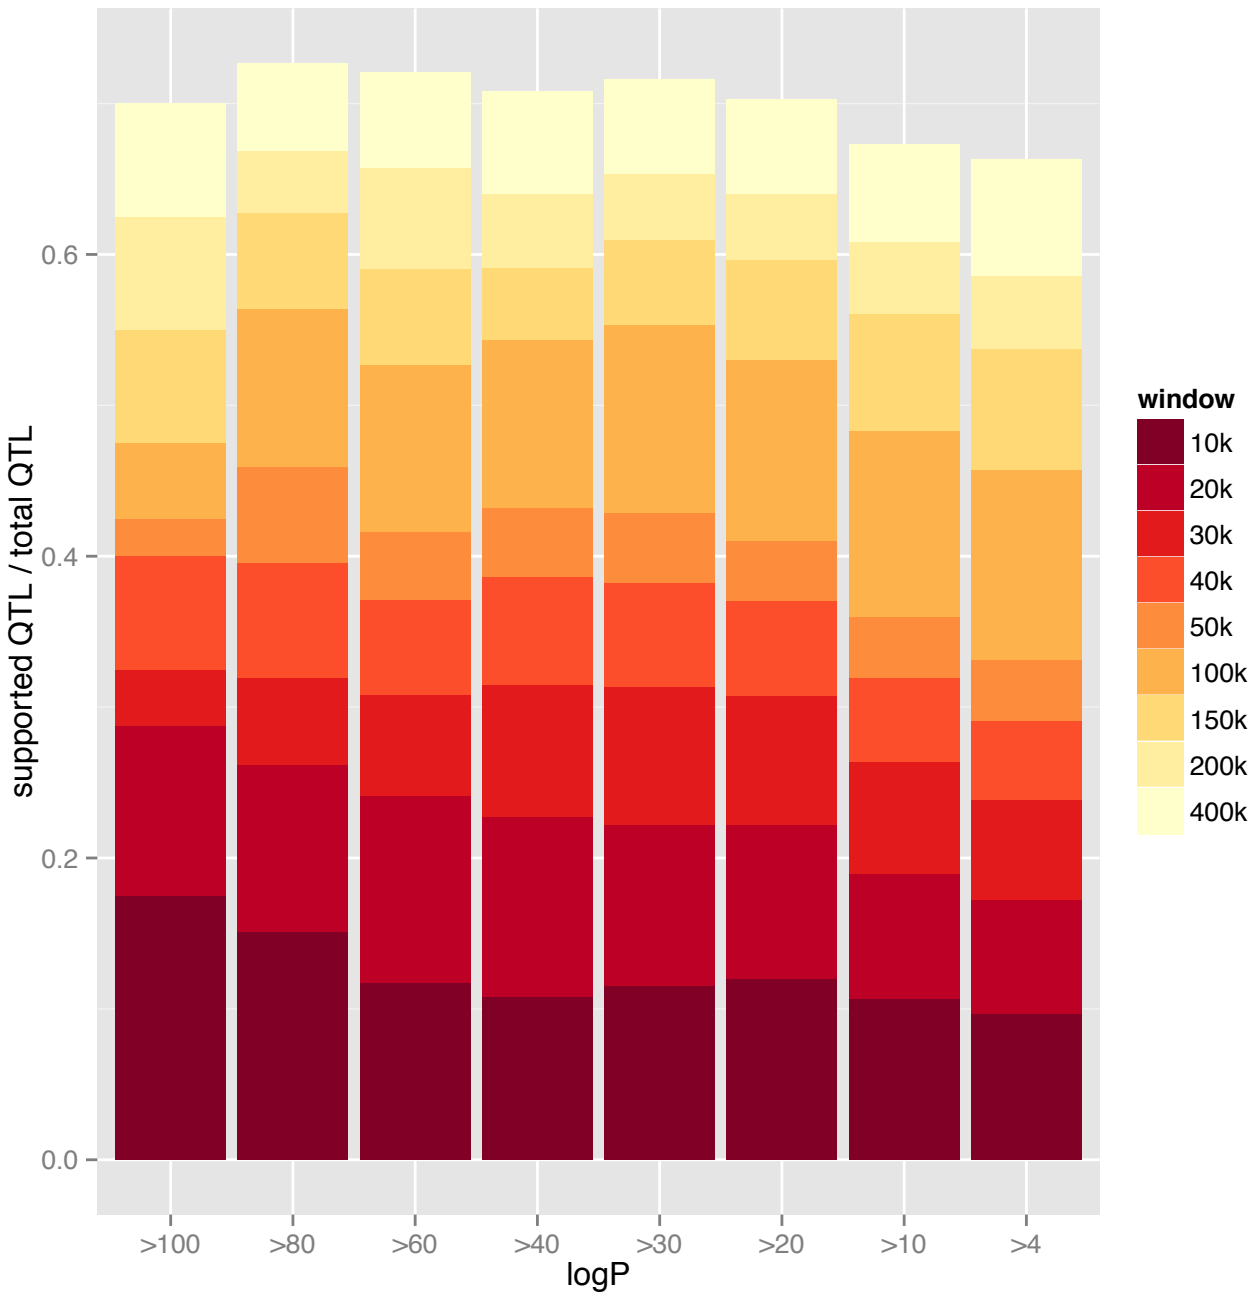

Supplement: 1425FigureS4.pdf [file 1425FigureS4.pdf]
